# Supplementary material
Source: MDPI journal article supplement (https://www.mdpi.com/2311-5637/8/4/188)
Supplement: s1 [file s1]

Supporting information for  
**Enhanced Phenazine-1-Carboxamide Production  
in *Pseudomonas chlororaphis* H5 $\Delta$ *fleQ* $\Delta$ *relA*  
through Fermentation Optimization**

Jiajia Cui <sup>1</sup>, Wei Wang <sup>1,\*</sup>, Hongbo Hu <sup>1,2</sup>, Hongyan Zhang <sup>3</sup> and Xuehong Zhang <sup>1</sup>

<sup>1</sup> State Key Laboratory of Microbial Metabolism, School of Life Sciences and Biotechnology, Shanghai Jiao Tong University, Shanghai 200240, China; jiajiacui613@163.com (J.C.); hbbhu@sjtu.edu.cn (H.H.); xuehzhang@sjtu.edu.cn (X.Z.)

<sup>2</sup> National Experimental Teaching Center for Life Sciences and Biotechnology, Shanghai Jiao Tong University, Shanghai 200240, China

<sup>3</sup> Shanghai Nong Le Biological Products Co., LTD., Shanghai 201419, China; hongyan.zhang@nonglesw.com

\* Correspondence: weiwang100@sjtu.edu.cn; Tel.: +86-21-3420-7047; Fax: +86-21-3420-5081

## Supplementary Table captions

**Table S1.** Factors and levels of the central composite design.

**Table S2.** Primers for qRT-PCR.

## Supplementary Figure captions

**Figure S1.** Three-dimensional response surface for the effects of independent variables on PCN production. (a) glycerol and soy peptone; (b) glycerol and soybean cake; (c) soy peptone and soybean cake.

**Figure S2.** Time profiles of OD<sub>600</sub> and specific cell growth rate (a), PCN production and PCN productivity (b), and glycerol concentration and glycerol consumption rate (c) with a constant fermentation pH of 7.2 in 1 L bioreactor.

**Figure S3.** Influence of the initial glycerol concentration on cell growth (a), PCN production (b), PCN productivity (c) and glycerol consumption (d) during fermentation in 1 L bioreactor. The purple hollow circles represent that the initial glycerol concentration was 9 g/L; the green solid squares represent that the initial glycerol concentration was 18 g/L; the red solid triangles represent that the initial glycerol concentration was 39.04 g/L (the glycerol concentration of the optimal medium).

**Table S1.** Factors and levels of the central composite design.

| Factor             | Variable       | Level  |      |      |      |       |
|--------------------|----------------|--------|------|------|------|-------|
|                    |                | -1.682 | -1   | 0    | 1    | 1.682 |
| Glycerol (g/L)     | X <sub>1</sub> | 35.0   | 37.0 | 40.0 | 43.0 | 45.0  |
| Soy peptone (g/L)  | X <sub>2</sub> | 27.3   | 32.8 | 40.8 | 48.8 | 54.3  |
| Soybean cake (g/L) | X <sub>3</sub> | 24.0   | 29.5 | 37.5 | 45.5 | 51.0  |

**Table S2.** Primers for qRT-PCR.

| <b>Primer</b>    | <b>Sequence(5' to 3')</b> |
|------------------|---------------------------|
| <i>phzD</i> -F   | TTCCATCGATAGTCCCTTA       |
| <i>phzD</i> -R   | ATTGCTCACCACCTTGTC        |
| <i>phzE</i> -F   | CCTGCTGGATGTGCTGAT        |
| <i>phzE</i> -R   | ATTGCTGCTCGGTGATGT        |
| <i>phzH</i> -F   | GTTGTTCAAGGAAATTCG        |
| <i>phzH</i> -R   | GTCGGCATTGATAAAACC        |
| <i>phzI</i> -F   | GCACCAGAATGAGAAGAT        |
| <i>phzI</i> -R   | CTTTCAATAATGTGTCGGAC      |
| <i>gacA</i> -F   | TGGTGTTCAAGTCATTCC        |
| <i>gacA</i> -R   | CGGTAACGGTAGGTATTC        |
| <i>aceE</i> -F   | TACGAACCTGAAAGATTC        |
| <i>aceE</i> -R   | TGGAAGAAGTAGTTGAAG        |
| <i>zwf</i> -F    | GCCGTCGCACTACATCTT        |
| <i>zwf</i> -R    | GCCTTGTTCTTGATCATCA       |
| <i>gltA</i> -F   | ATGTTACCGTGATCTTC         |
| <i>gltA</i> -R   | TTACTTGCGATCTTCCAG        |
| <i>glnA</i> -F   | GTCGGTTCAACTCATCAA        |
| <i>glnA</i> -R   | GAAGAAGTCGTCATCCAG        |
| <i>ccoO</i> -2-F | GTACAACGACGAGGATAT        |
| <i>ccoO</i> -2-R | CACCTCTTGCTCTTGATC        |
| <i>ccoQ</i> -2-F | GTCTTGAACCTCGATACCG       |
| <i>ccoQ</i> -2-R | GATTGAGCGTCATCAGAT        |
| 16S-F            | ACTCCTACGGGAGGCAGCA       |
| 16S-R            | GGACTACTGGGGTTTCTAAT      |

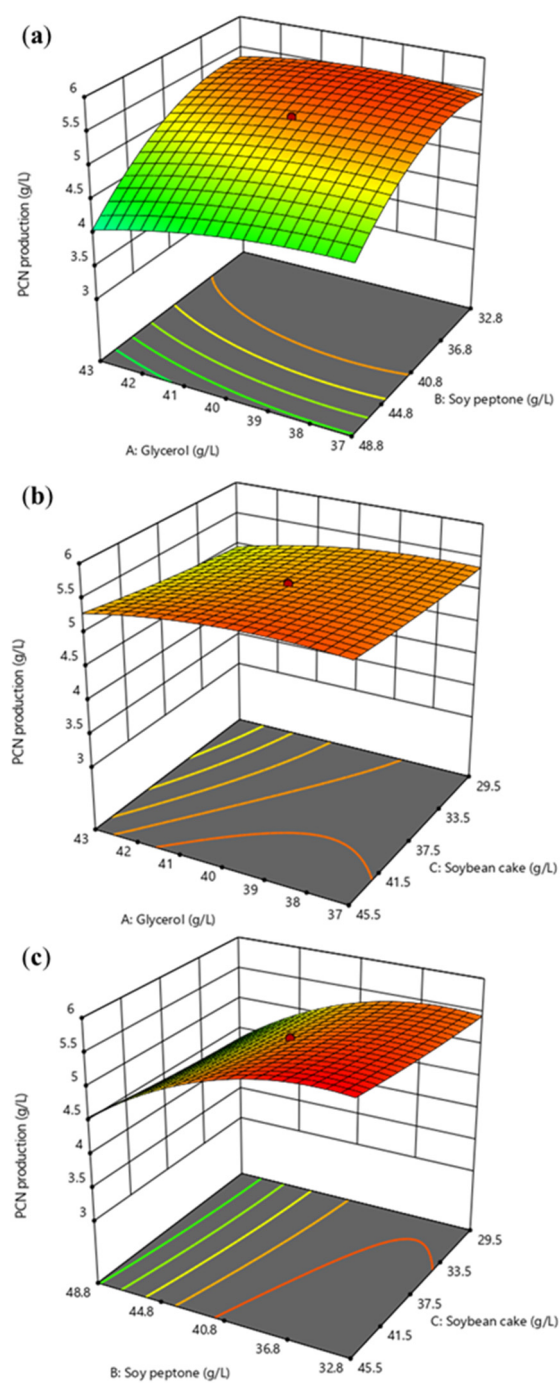

**Figure S1.** Three-dimensional response surface for the effects of independent variables on PCN production. (a) glycerol and soy peptone; (b) glycerol and soybean cake; (c) soy peptone and soybean cake.

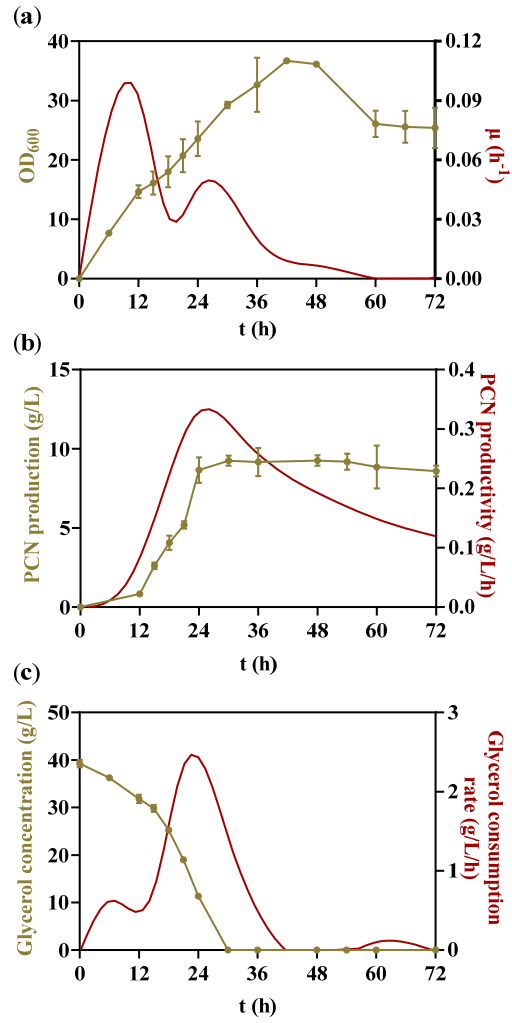

**Figure S2.** Time profiles of OD<sub>600</sub> and specific cell growth rate (a), PCN production and PCN productivity (b), and glycerol concentration and glycerol consumption rate (c) with a constant fermentation pH of 7.2 in 1 L bioreactor.

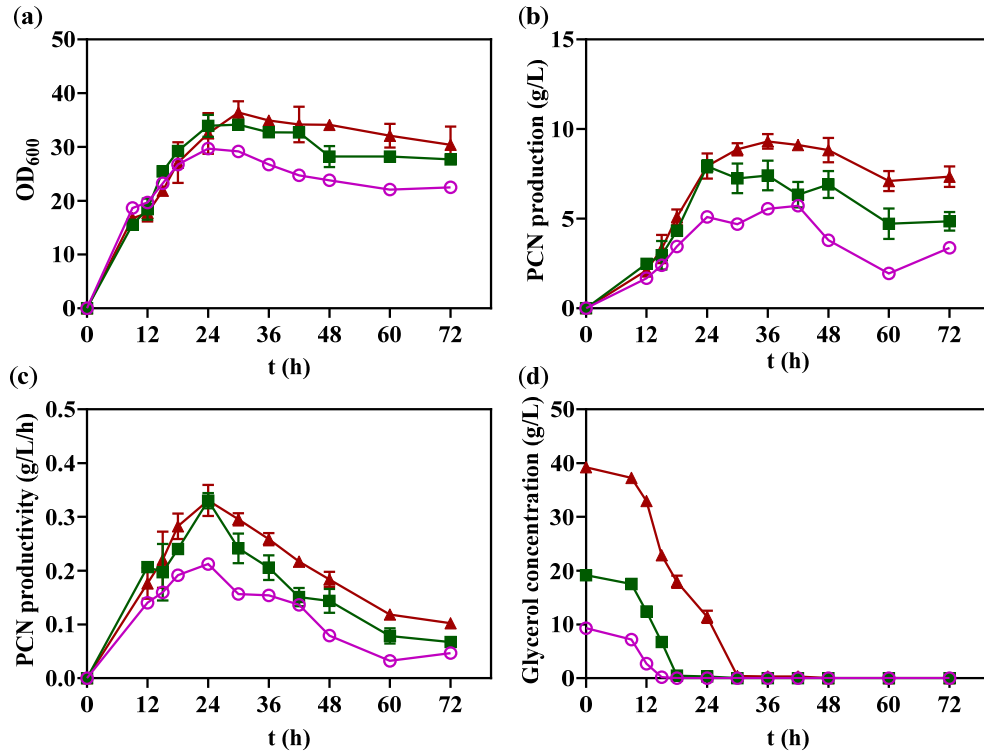

**Figure S3.** Influence of the initial glycerol concentration on cell growth (a), PCN production (b), PCN productivity (c) and glycerol consumption (d) during fermentation in 1 L bioreactor. The purple hollow circles represent that the initial glycerol concentration was 9 g/L; the green solid squares represent that the initial glycerol concentration was 18 g/L; the red solid triangles represent that the initial glycerol concentration was 39.04 g/L (the glycerol concentration of the optimal medium).
